# Supplementary material
Source: PubMed Central journal article supplement (PMC8204865)
Supplement: EMBJ-40-e107270-s003.pdf [file EMBJ-40-e107270-s003.pdf]

## Expanded View Figures

### Figure EV1. Characterization of NEAT1 mutants with deletions in the NEAT1\_2 3' terminal regions.

- A (left) SRM images of the paraspeckles in HAP1 WT cells detected by NEAT1\_5' (green) and NEAT1\_3' (magenta) FISH probes with MG132 treatment (5  $\mu$ M for 6 h). Scale bar, 500 nm. (right) Graph showing the proportion of paraspeckles with localization of the NEAT1 3' ends to the core and shell or the shell in WT cells ( $n = 167$ ).
- B Graph showing the proportion of paraspeckles with localization of the NEAT1 5' ends to the core and shell or the shell in WT,  $\Delta 3'$ ,  $\Delta 16.6$ –20.2 kb, and  $\Delta 20.2$ –22.6 kb cells treated with MG132 (5  $\mu$ M for 6 h; WT:  $n = 115$ ,  $\Delta 3'$ :  $n = 21$ ,  $\Delta 16.6$ –20.2 kb:  $n = 161$ , and  $\Delta 20.2$ –22.6 kb:  $n = 89$ ).
- C (left) Detection of NEAT1\_2 by single-molecule FISH (smFISH; magenta) in HAP1 WT,  $\Delta 3'$ ,  $\Delta 16.6$ –20.2 kb, and  $\Delta 20.2$ –22.6 kb cells treated with MG132 (5  $\mu$ M for 6 h). Nuclei were stained with DAPI. Scale bar, 10 nm. (right) Quantitation of area and sum intensity per paraspeckle in each cell line (WT:  $n = 407$ ,  $\Delta 3'$ :  $n = 314$ ,  $\Delta 16.6$ –20.2 kb:  $n = 302$ , and  $\Delta 20.2$ –22.6 kb:  $n = 609$ ). (\*\*\*) $p = 0.0001$ , (\*\*\*\*) $p < 0.0001$ , compared with WT: Kruskal–Wallis test with Dunn's multiple comparison test). Each box plot shows the median (inside line), 25–75 percentiles (box bottom to top), and 10–90 percentiles (whisker bottom to top).
- D (left) EM observations of the paraspeckles in MG132-treated (5  $\mu$ M for 17 h) HAP1  $\Delta 3'$  cells using NEAT1\_5' probe. Scale bar, 100 nm. (middle) Graph showing the proportion of the localization of NEAT1\_5' probes (838 gold particles) within the paraspeckles in  $\Delta 3'$  cells. (right) Graph showing the proportion of localization of NEAT1\_5' probes in each paraspeckle in  $\Delta 3'$  cells ( $n = 21$ ). The box plot shows the median (inside line), 25–75 percentiles (box bottom to top), and 10–90 percentiles (whisker bottom to top).
- E (left) EM observation of the paraspeckles in MG132-treated (5  $\mu$ M for 17 h) HAP1 WT cells using NEAT1\_5' probe. Scale bar, 100 nm. (middle) Graph showing the proportion of localization of NEAT1\_5' probes (601 gold particles) within the paraspeckles in WT cells. (right) Graph showing the proportion of localization of NEAT1\_5' probes in each paraspeckle in WT cells ( $n = 16$ ). The box plot shows the median (inside line), 25–75 percentiles (box bottom to top), and 10–90 percentiles (whisker bottom to top).
- F (left) EM observation of the paraspeckles in MG132-treated (5  $\mu$ M for 17 h) HAP1 WT cells using the NEAT1\_D2 probe. Scale bar, 100 nm. (middle) Graph showing the proportion of localization of NEAT1\_D2 probes (461 gold particles) within the paraspeckles in WT cells. (right) Graph showing the proportion of localization of NEAT1\_D2 probes in each paraspeckle in WT cells ( $n = 24$ ). The box plot shows the median (inside line), 25–75 percentiles (box bottom to top), and 10–90 percentiles (whisker bottom to top).
- G Quantitation of the relative expression levels of NEAT1\_1 and NEAT1\_2 by RT–qPCR in HAP1 WT,  $\Delta 16.6$ –20.2 kb, and  $\Delta 20.2$ –22.6 kb cells treated with MG132 (5  $\mu$ M for 6 h). Data are represented as mean  $\pm$  SD ( $n = 3$ ).
- H SRM images of the paraspeckles in MG132-treated (5  $\mu$ M for 6 h) WT cells detected by NEAT1\_5' (green) and NEAT1\_19k (magenta) FISH probes. Scale bar, 500 nm.
- I Graph showing the proportion of paraspeckles with localization of the NEAT1\_19k probes to the core and shell or the core in WT cells treated with MG132 (5  $\mu$ M for 6 h;  $n = 103$ ).

Source data are available online for this figure.

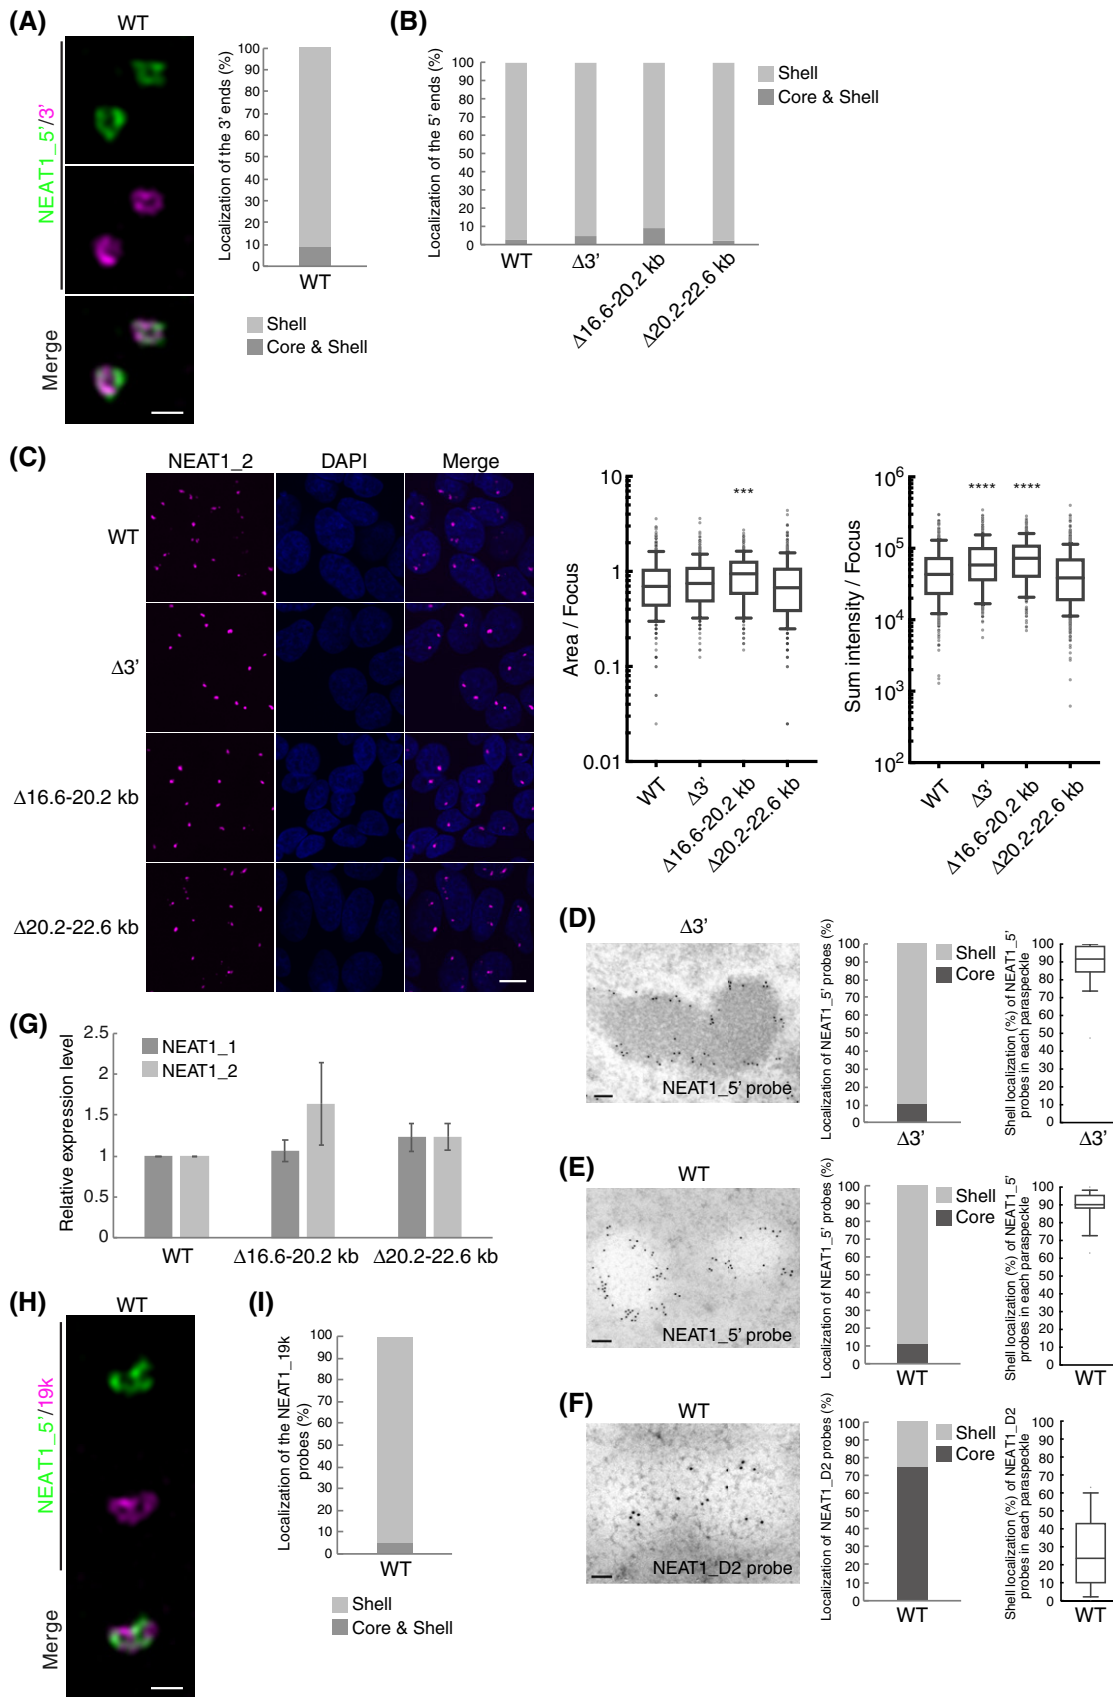

Figure EV1.

**Figure EV2. Characterization of NEAT1 mutants with deletions in the NEAT1\_2 5' terminal regions.**

- A Quantitation of the relative expression levels of NEAT1\_1 and NEAT1\_2 by RT-qPCR in HAP1 WT,  $\Delta 5'$ , and  $\Delta 5'/\Delta PAS$  cells treated with MG132 (5  $\mu\text{M}$  for 6 h). Data are represented as mean  $\pm$  SD ( $n = 3$ ).
- B (upper) Detection of NEAT1\_2 by smFISH (magenta) in WT,  $\Delta 0\text{--}0.8$  kb,  $\Delta 5'$ , and  $\Delta 5'/\Delta PAS$  kb cells treated with MG132 (5  $\mu\text{M}$  for 6 h). Nuclei were stained with DAPI. Scale bar, 10 nm. (lower) Quantitation of area and sum intensity per paraspeckle in each cell line (WT:  $n = 839$ ,  $\Delta 0\text{--}0.8$  kb:  $n = 845$ ,  $\Delta 5'$ :  $n = 535$ , and  $\Delta 5'/\Delta PAS$ :  $n = 652$ ). ( $*P = 0.0420$ ,  $****P < 0.0001$ , compared with WT: Kruskal-Wallis test with Dunn's multiple comparison test). Each box plot shows the median (inside line), 25–75 percentiles (box bottom to top), and 10–90 percentiles (whisker bottom to top).
- C Graph showing the proportion of paraspeckles with localization of the NEAT1 3' ends to the core and shell or the shell in WT,  $\Delta 0\text{--}0.8$  kb, and  $\Delta 5'$  cells treated with MG132 (5  $\mu\text{M}$  for 6 h) by SRM analyses (WT:  $n = 167$ ,  $\Delta 0\text{--}0.8$  kb:  $n = 77$ ,  $\Delta 5'$ :  $n = 48$ ).
- D (upper panels) EM observations of the paraspeckles in MG132-treated (5  $\mu\text{M}$  for 17 h) WT and  $\Delta 5'$  cells using the NEAT1\_D2 probe. Scale bar, 100 nm. (bottom, left) Graph showing the proportion of localization (three layers: outer, middle, and inner layers [black circles indicate the boundaries]) of NEAT1\_D2 probes (WT: 307 gold particles,  $\Delta 5'$ : 167 gold particles) within the paraspeckles in HAP1  $\Delta 5'$  cells. (bottom, right) Graph showing the proportion of localization of NEAT1\_D2 probes in each paraspeckle in WT ( $n = 22$ ) and  $\Delta 5'$  cells ( $n = 15$ ). ( $***P = 0.0001$ ,  $****P < 0.0001$ , compared with WT: Mann-Whitney test (two-tailed)). Each box plot shows the median (inside line), 25–75 percentiles (box bottom to top), and 10–90 percentiles (whisker bottom to top).
- E Quantitation of the relative expression levels of NEAT1\_1 and NEAT1\_2 by RT-qPCR in HAP1 WT and  $\Delta 0\text{--}2.8$  kb cells. Data are represented as mean  $\pm$  SD ( $n = 3$ ).
- F Detection of the paraspeckles by smFISH in WT and  $\Delta 0\text{--}2.8$  kb cells. Scale bar, 10 nm.
- G (left) The paraspeckles in  $\Delta 5'/\Delta PAS$  cells treated with MG132 treatment (5  $\mu\text{M}$  for 6 h) detected with SRM by NEAT1\_2k (green) and 3' (magenta) FISH probes. Scale bar, 500 nm. (right) Graph showing the proportion of paraspeckles with localization of the NEAT1 5' ends to the core and shell or the shell in  $\Delta 5'/\Delta PAS$  cells ( $n = 31$ ).

Source data are available online for this figure.

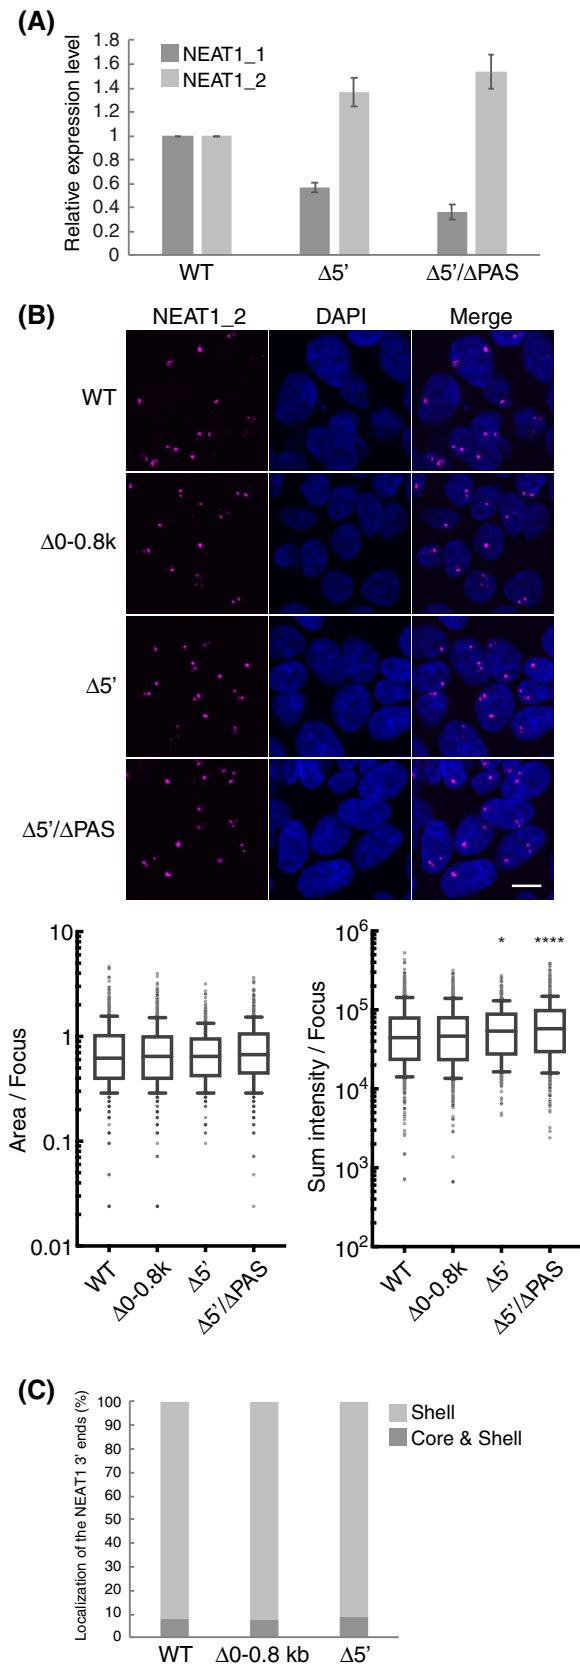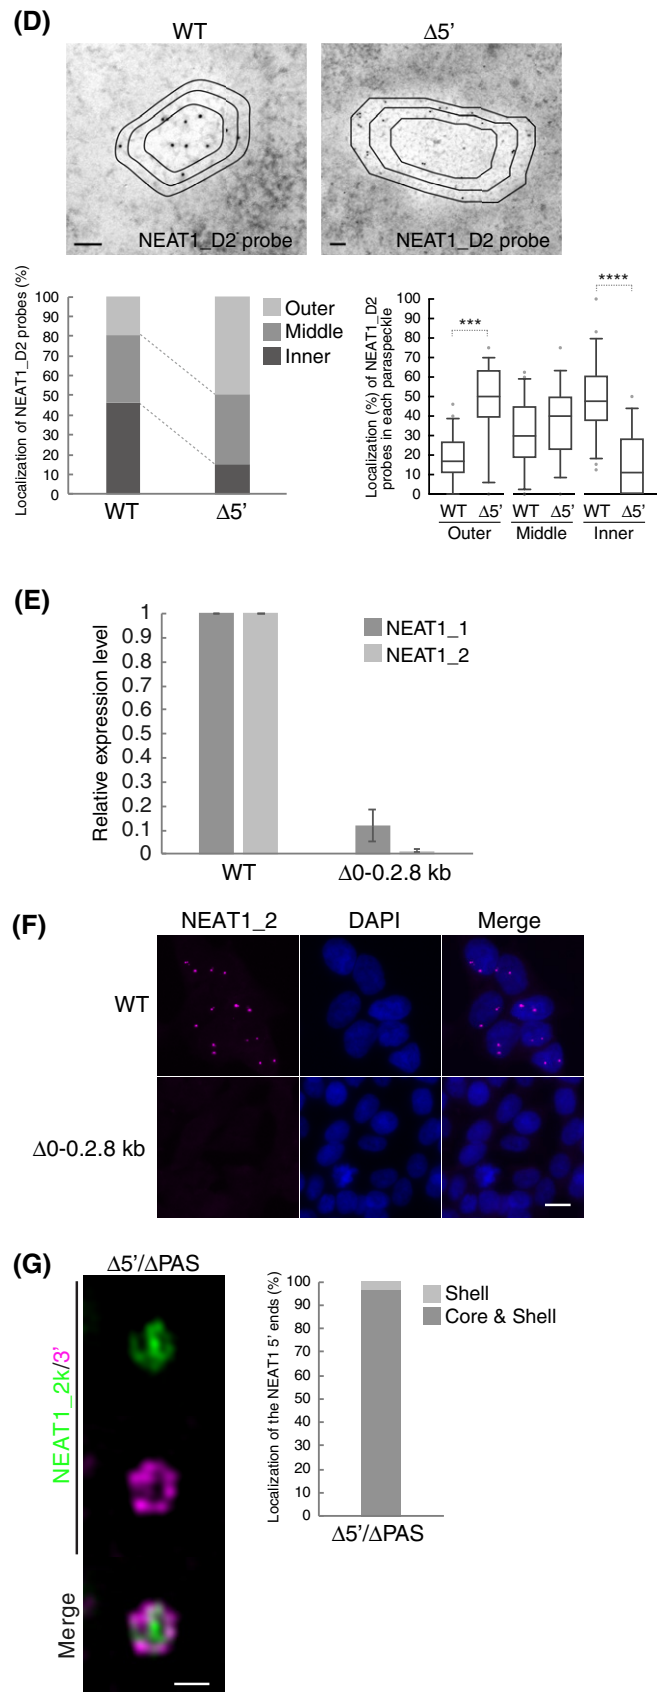

Figure EV2.

**Figure EV3. Characterization of NEAT1 mutants with deletions in both the NEAT1\_2 5' and 3' regions.**

- A Quantitation of the relative expression levels of NEAT1\_1 and NEAT1\_2 by RT-qPCR in HAP1 WT,  $\Delta 5'/\Delta 3'$ , and  $\Delta 5'/\Delta 3'/\Delta \text{PAS}$  cells treated with MG132 (5  $\mu\text{M}$  for 6 h). Data are represented as mean  $\pm$  SD ( $n = 3$ ).
- B (left) Detection of NEAT1\_2 by smFISH (magenta) in WT,  $\Delta 5'/\Delta 3'$ , and  $\Delta 5'/\Delta 3'/\Delta \text{PAS}$  cells treated with MG132 (5  $\mu\text{M}$  for 6 h). Nuclei were stained with DAPI. Scale bar, 10 nm. (right) Quantitation of area and sum intensity per paraspeckle in each cell line (WT:  $n = 744$ ,  $\Delta 5'/\Delta 3'$ :  $n = 425$ , and  $\Delta 5'/\Delta 3'/\Delta \text{PAS}$ :  $n = 435$ ). (\*\*\*\* $P < 0.0001$ , compared with WT: Kruskal–Wallis test with Dunn's multiple comparison test). Each box plot shows the median (inside line), 25–75 percentiles (box bottom to top), and 10–90 percentiles (whisker bottom to top).
- C The paraspeckles detected with SRM by NEAT1\_2k FISH probe (green), and NEAT1\_15k FISH probe or NONO IF (magenta) in the  $\Delta 5'/\Delta 3'/\Delta \text{PAS}$  cells treated with MG132 (5  $\mu\text{M}$  for 6 h). Scale bar, 500 nm.
- D Graph showing proportion of paraspeckles with localization of the NEAT1 5' (left,  $n = 41$ ) and 3' (right,  $n = 14$ ) ends to the core and shell in  $\Delta 5'/\Delta 3'/\Delta \text{PAS}$  cells treated with MG132 (5  $\mu\text{M}$  for 6 h).

Source data are available online for this figure.

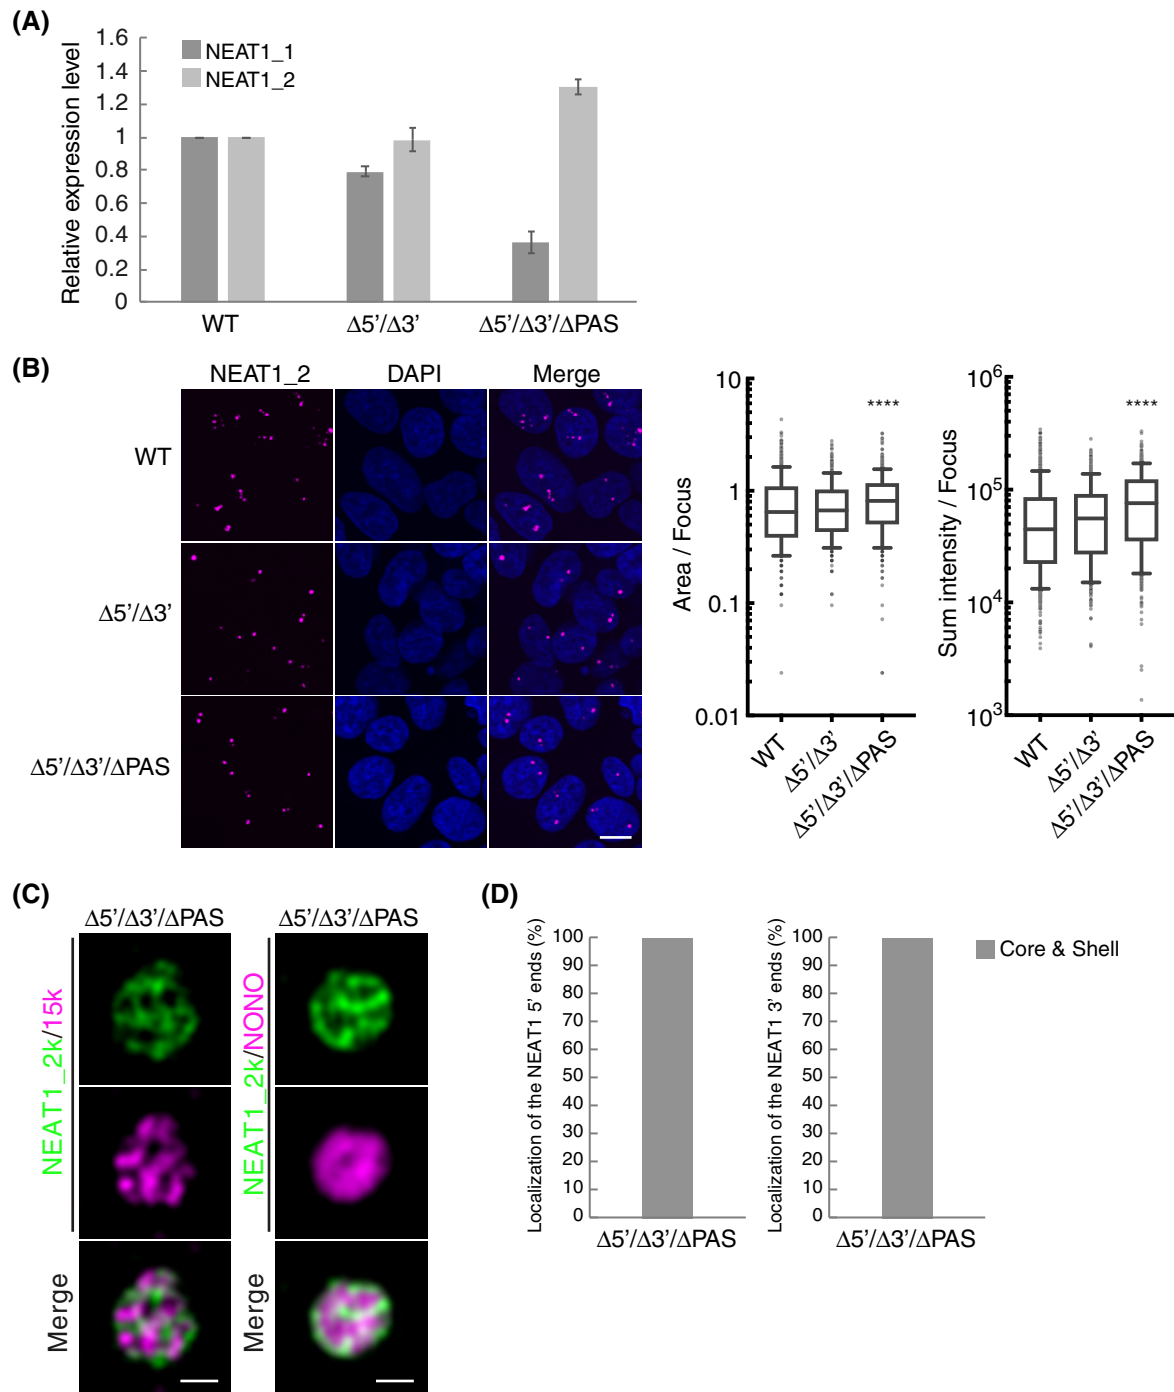

Figure EV3.

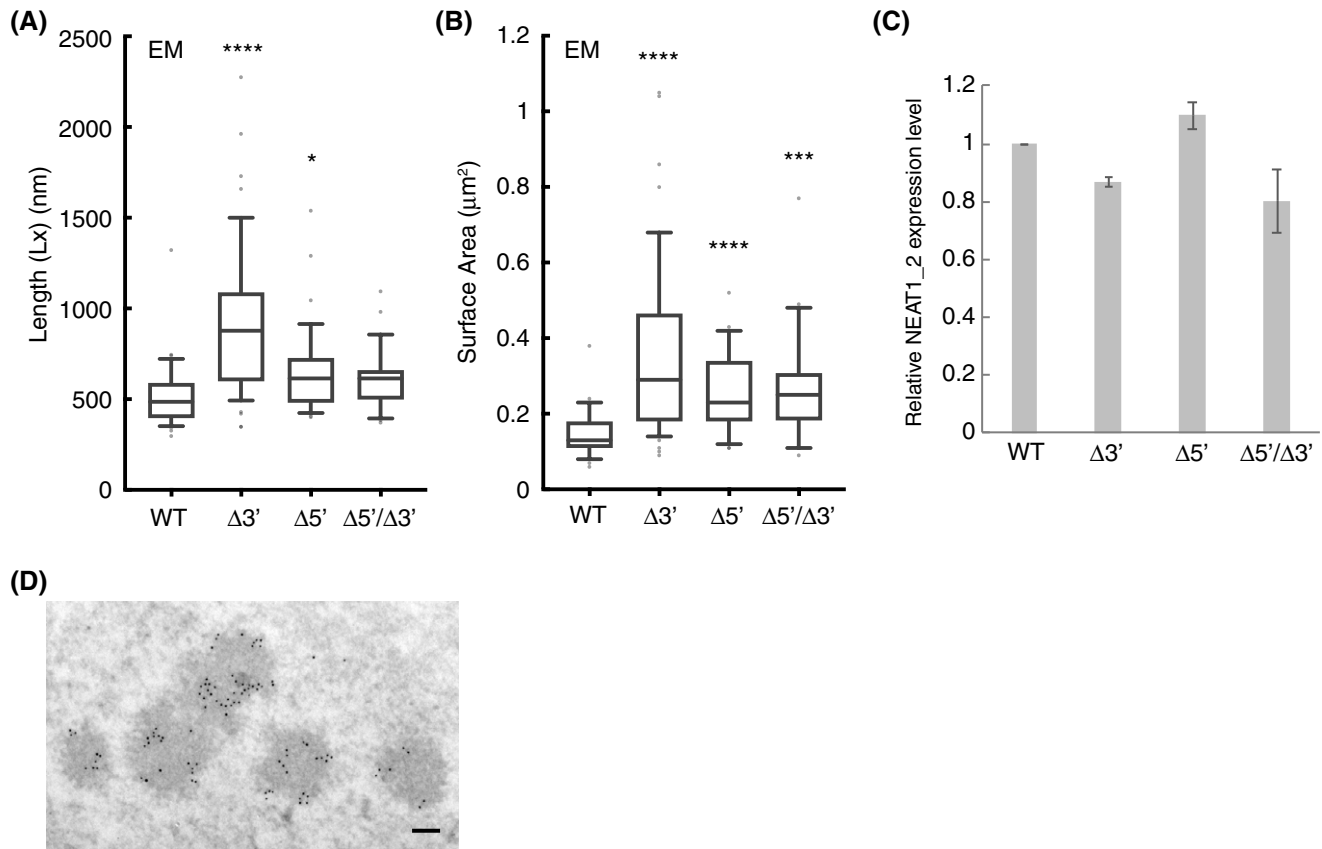

**Figure EV4. Additional size and structure parameters determined by EM for the paraspeckles of NEAT1 mutants.**

- A Length (Lx) of the paraspeckles determined by EM in HAP1 WT, Δ3', Δ5', and Δ5'/Δ3' cells treated with MG132 (5 μM for 17 h). WT (mean size: 518.6 nm,  $n = 35$ ), Δ3' (mean size: 937.1 nm,  $n = 49$ ), Δ5' (mean size: 648.1 nm,  $n = 39$ ), and Δ5'/Δ3' (mean size: 608.9 nm,  $n = 28$ ). (\* $P = 0.0451$ , \*\*\*\* $P < 0.0001$ , compared with WT). Each box plot shows the median (inside line), 25–75 percentiles (box bottom to top), and 10–90 percentiles (whisker bottom to top).
- B Surface area of the paraspeckles determined by EM in WT, Δ3', Δ5', and Δ5'/Δ3' cells treated with MG132 (5 μM for 17 h). WT (mean area: 0.1497 μm<sup>2</sup>,  $n = 35$ ), Δ3' (mean area: 0.3684 μm<sup>2</sup>,  $n = 49$ ), Δ5' (mean area: 0.2582 μm<sup>2</sup>,  $n = 39$ ), and Δ5'/Δ3' (mean area: 0.2657 μm<sup>2</sup>,  $n = 28$ ). (\*\* $P = 0.0008$ , \*\*\*\* $P < 0.0001$ , compared with WT). Each box plot shows the median (inside line), 25–75 percentiles (box bottom to top), and 10–90 percentiles (whisker bottom to top).
- C An analysis of the NEAT1\_2 expression levels for quantification of the NEAT1\_2 number per paraspeckle. Data are represented as mean ± SD ( $n = 3$ ).
- D A representative image of a cluster of paraspeckles detected by paraspeckle marker proteins, Brg1 (gold particles) under EM in the presence of MG132. In this image, five paraspeckles form a cluster. Scale bar, 100 nm.

**Figure EV5. Contributions of stretching free energy of B blocks in the core to the structure of paraspeckles.**

- A Energetic contributions of triblock copolymer micelle model of the paraspeckle considering elastic free energy of B blocks (see the Materials and Methods for details).
- B Theoretical calculation of the fraction  $\alpha$  of the A blocks in the shell versus the length of the A blocks (represented by the number of segments) of spherical paraspeckles in the steady state with (magenta) and without (black) the stretching free energy of B blocks in the core. The parameters used for the calculations are shown in the Materials and Methods (the broken curves are results for the excluded volume  $v_A/b^3 = 0.5$  and  $v_C/b^3 = 0.5$ ). These data are related to Fig 4D.
- C Theoretical calculation of the radius of paraspeckles versus the length of the A blocks (represented by the number of segments) of spherical paraspeckles in the steady state with (magenta) and without (black) the stretching free energy of B blocks in the core. The radius was rescaled by the segment length. The parameters used for the calculations are shown in the Materials and Methods (the broken curves are the results for the excluded volume  $v_A/b^3 = 0.5$  and  $v_C/b^3 = 0.5$ ). These data are related to Fig 5A.
- D Theoretical calculation of the number of NEAT1\_2 transcripts versus the length of the A blocks (represented by the number of segments) of spherical paraspeckles in the steady state with (magenta) and without (black) the stretching free energy of B blocks in the core. The parameters used for the calculations are shown in the Materials and Methods (the broken curves are the results for the excluded volume  $v_A/b^3 = 0.5$  and  $v_C/b^3 = 0.5$ ). These data are related to Fig 5B.
- E Theoretical calculation of the fraction of A (or C) blocks in the shell vs the logarithm of the transcription rate (rescaled by the rate at which the transcripts are spontaneously incorporated in the paraspeckle). The numbers of segments of A blocks were 5.0 (cyan), 7.5 (orange), 8.15785 (brown), and 8.86482 (black). The parameters used for the calculations are shown in the Materials and Methods (the broken curves are the results for the excluded volume  $v_A/b^3 = 0.5$  and  $v_C/b^3 = 0.5$ ). These data are related to Fig 6E.

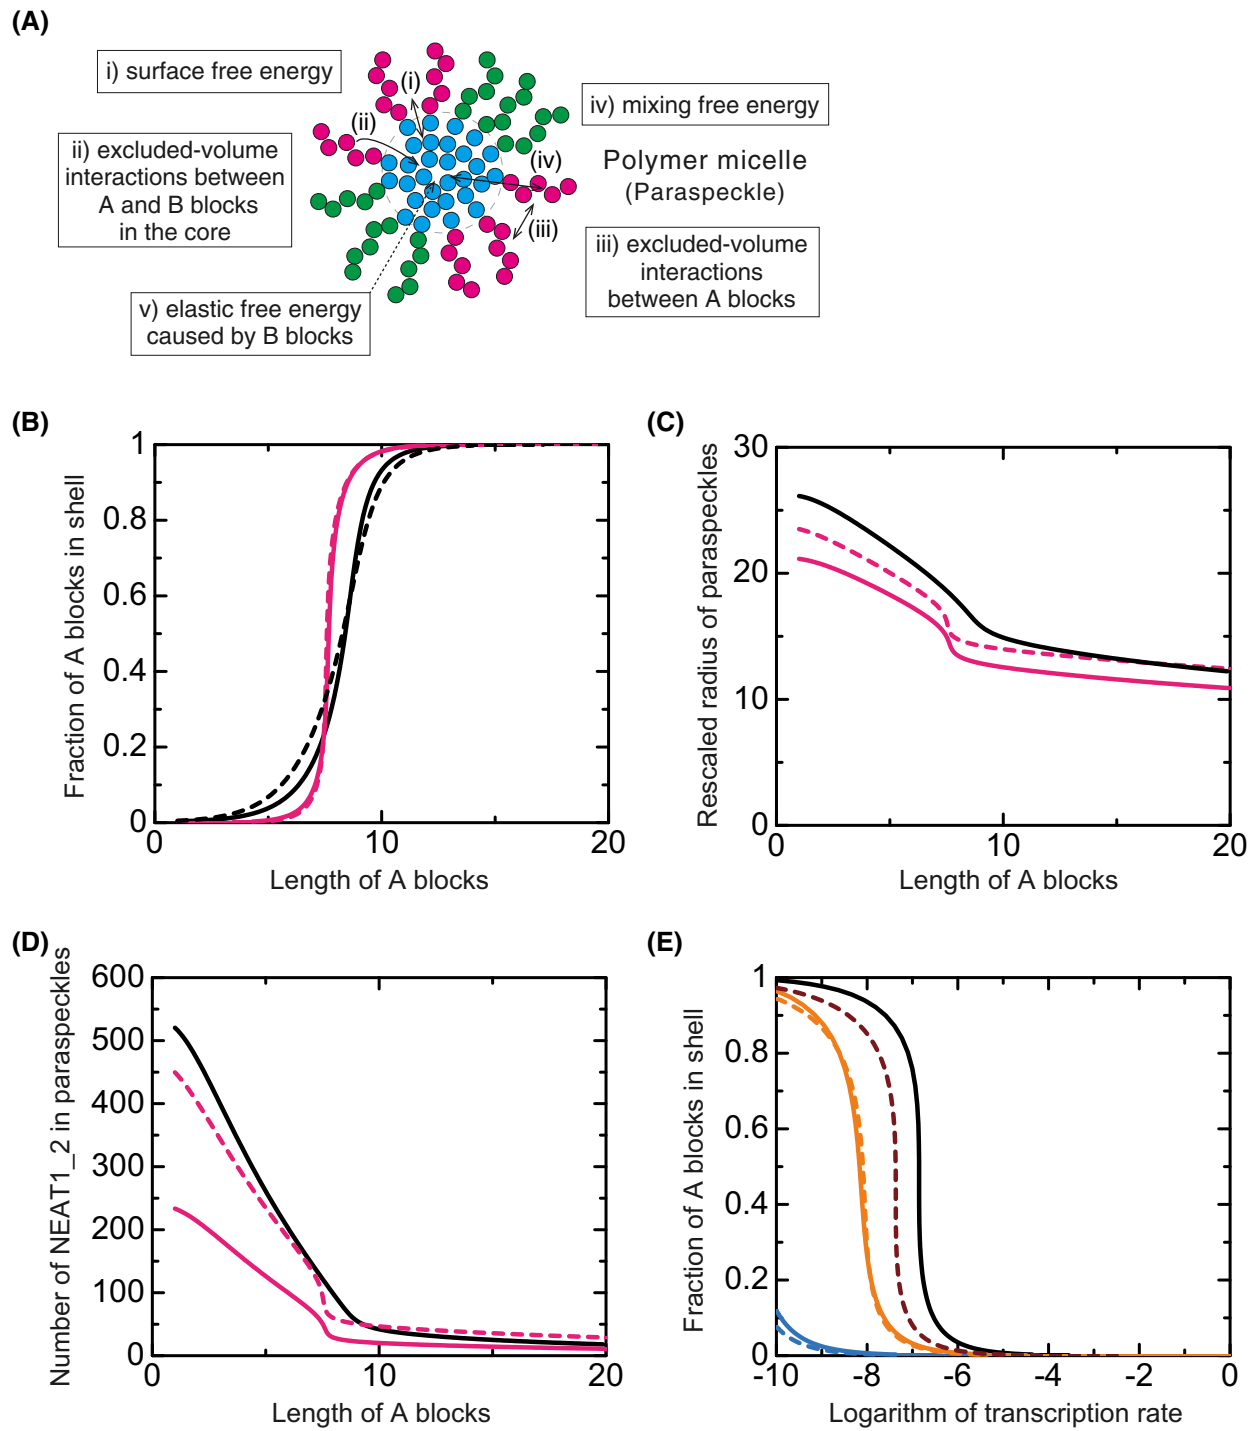

Figure EV5.
