# Supplementary material
Source: PubMed Central journal article supplement (PMC8204865)

C

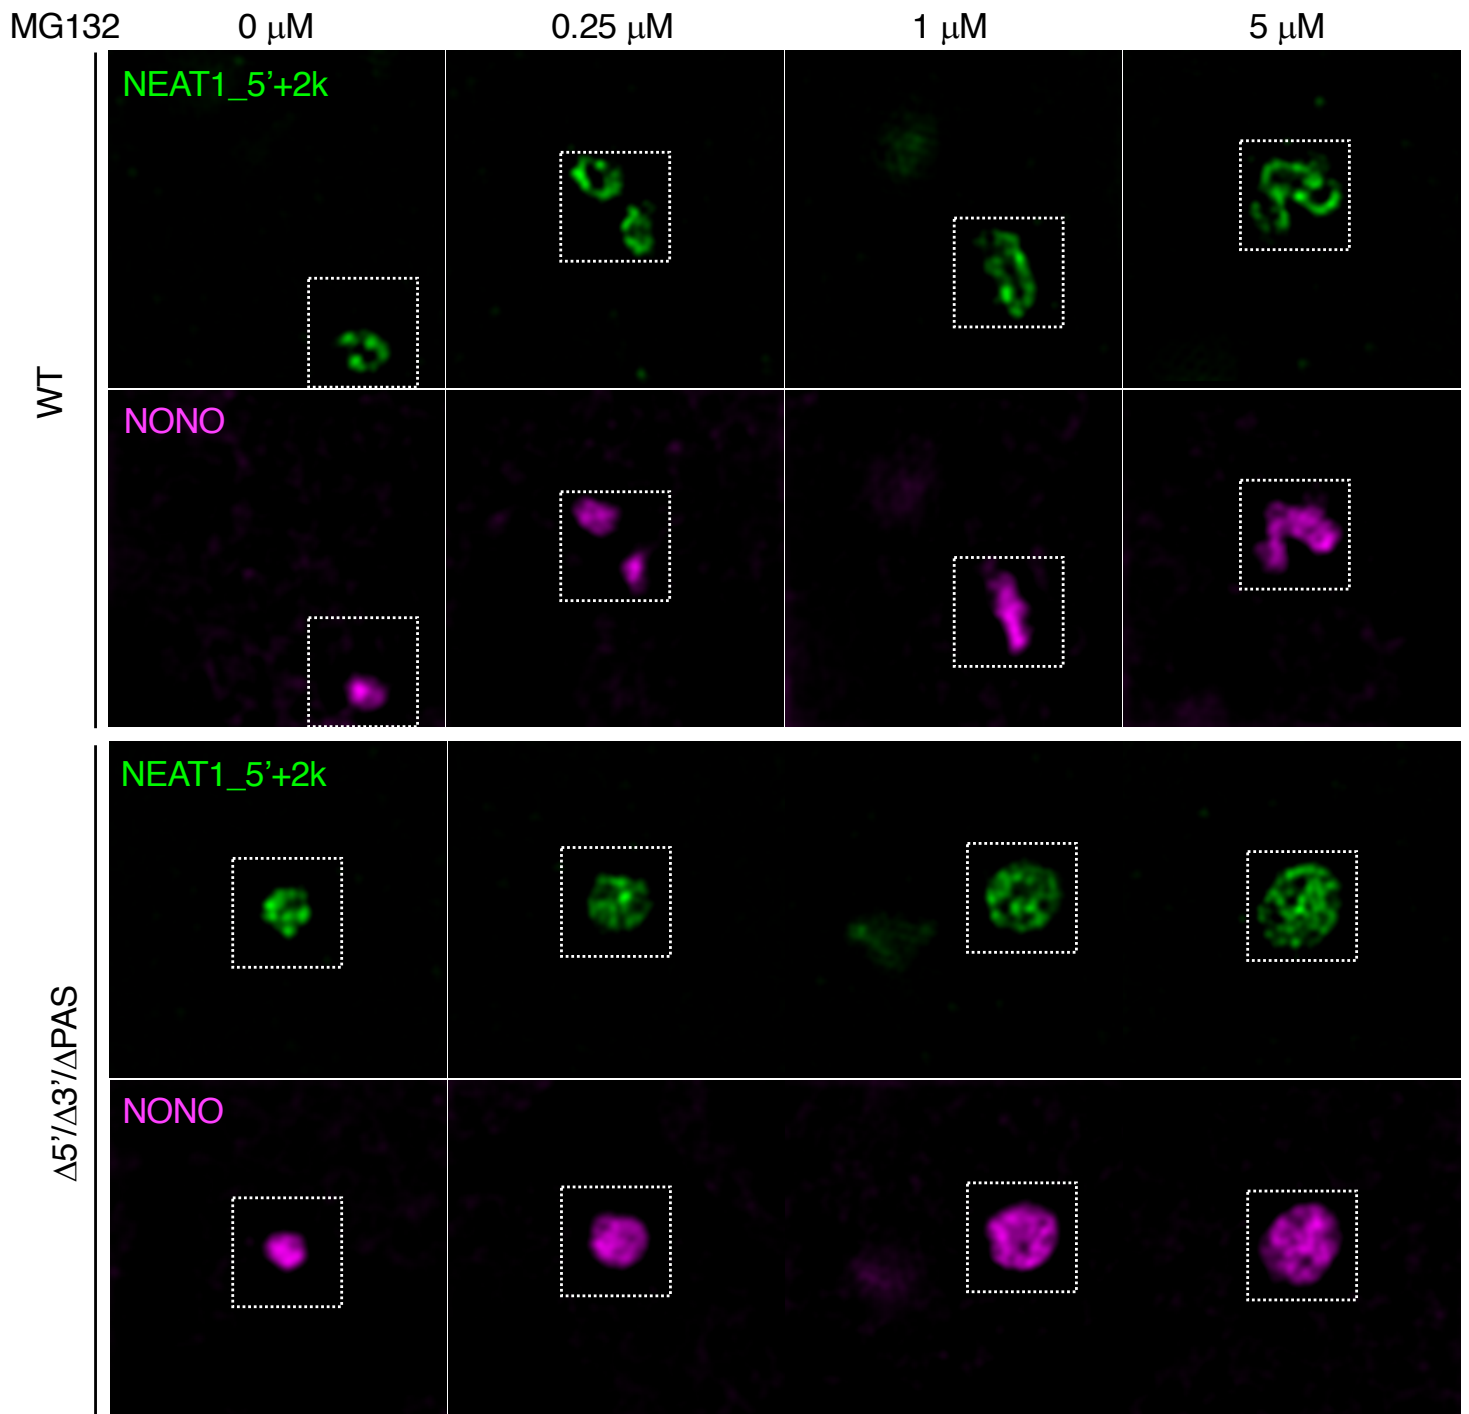

G

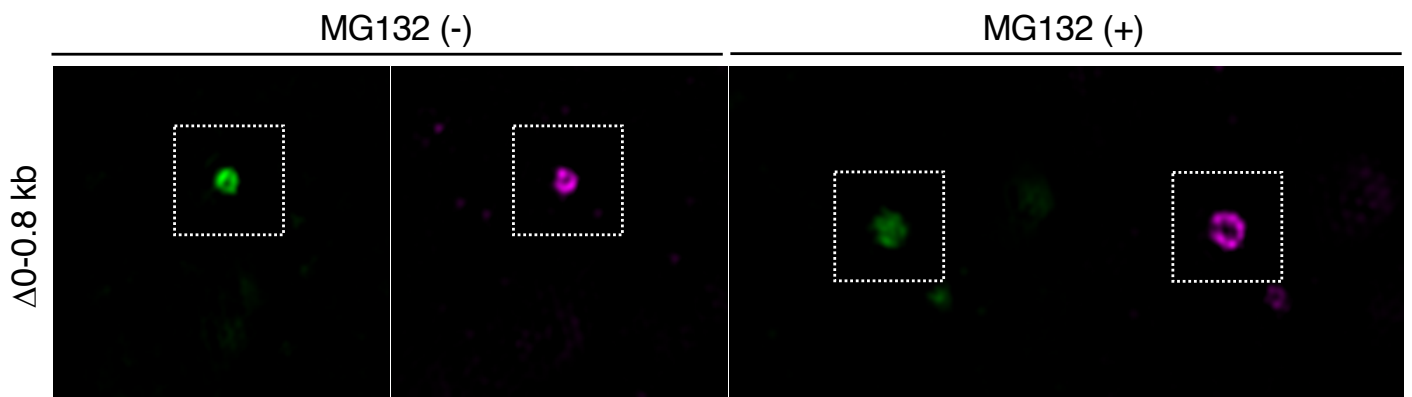

The images in the figure panels are marked by dotted squares.

Supplement: EMBJ-40-e107270-s001.pdf [file EMBJ-40-e107270-s001.pdf]

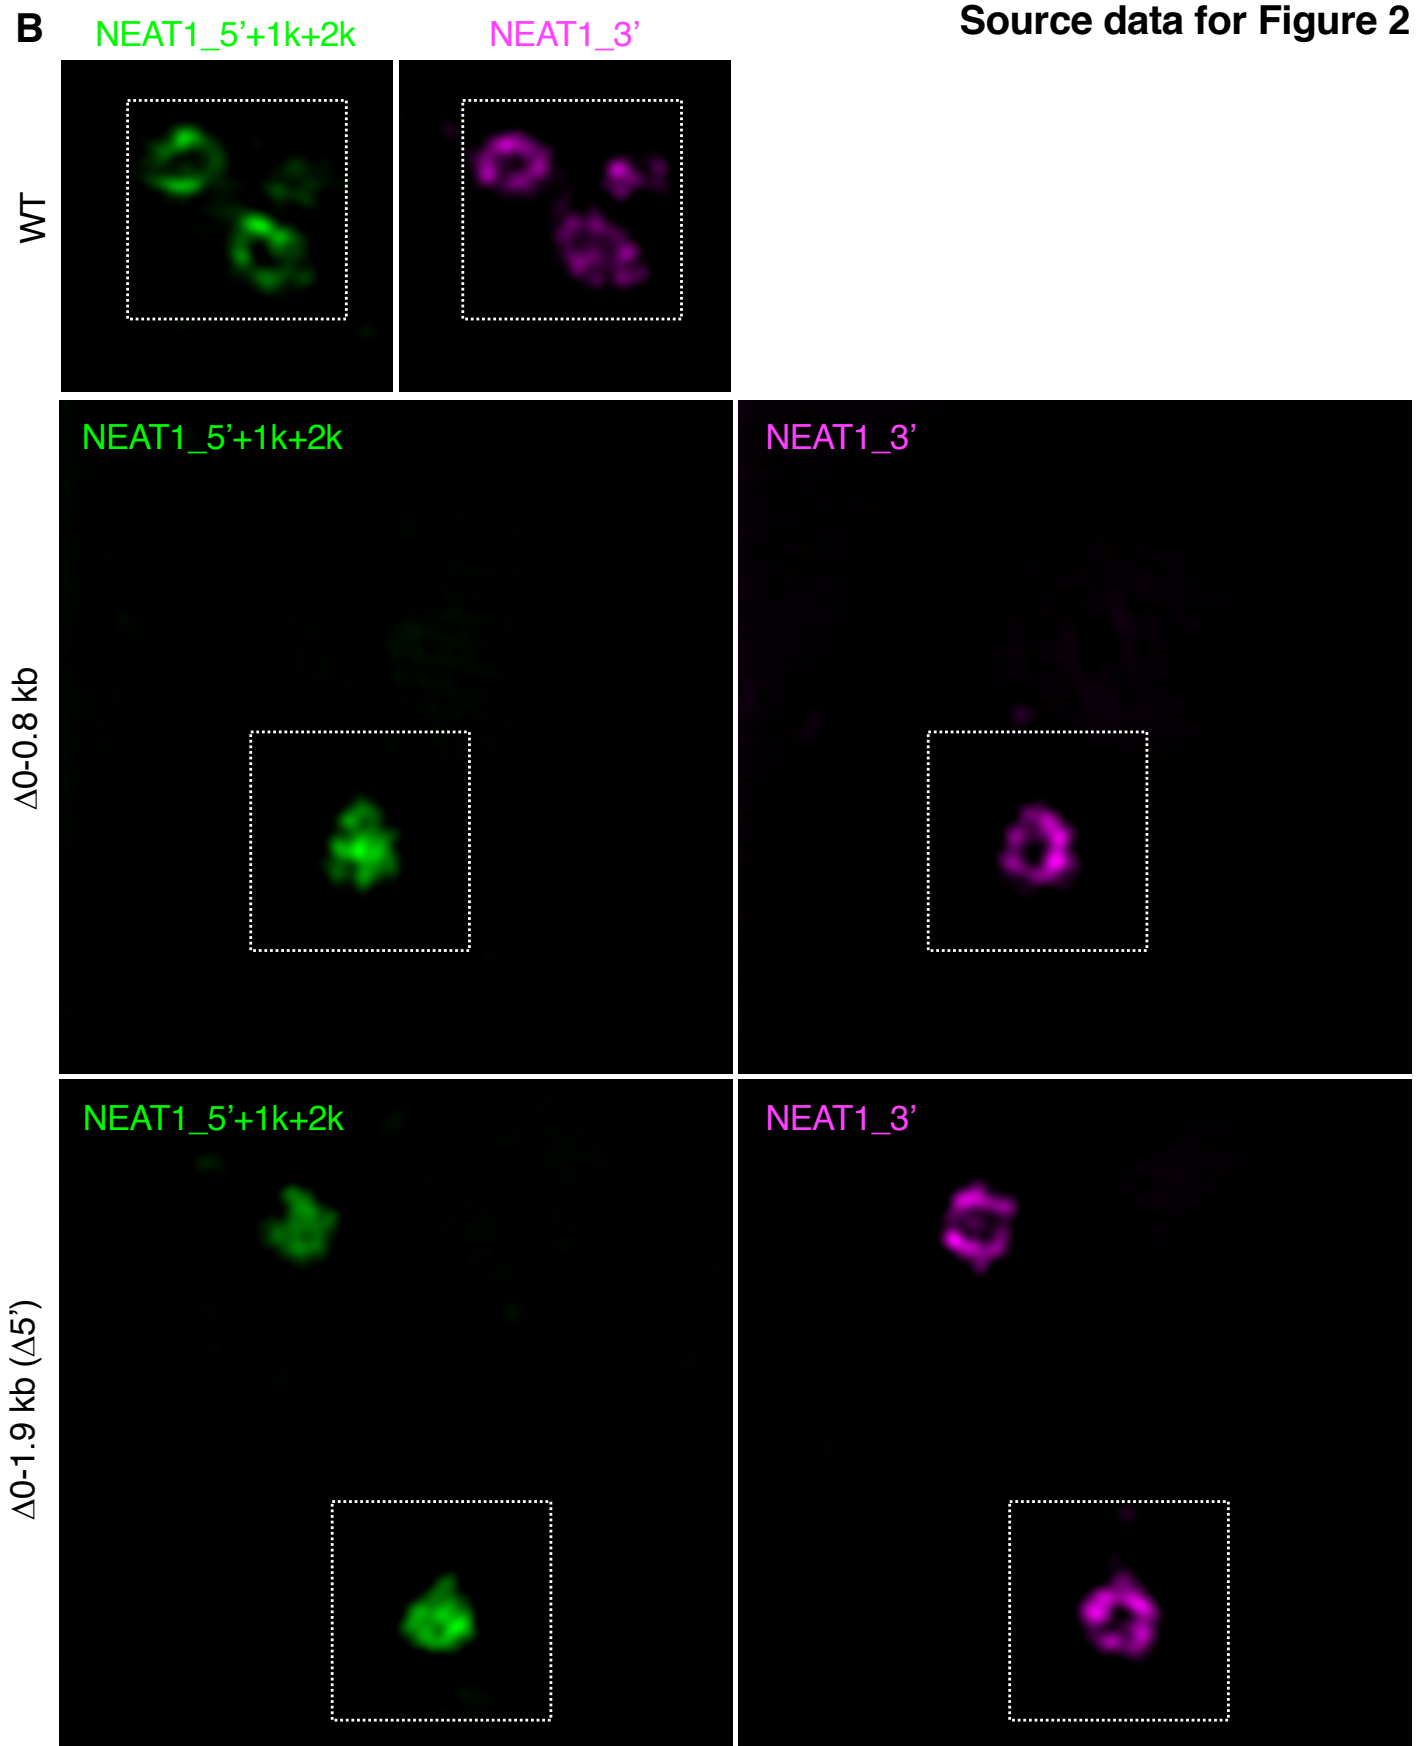

The images in the figure panels are marked by dotted squares.

Supplement: EMBJ-40-e107270-s002.pdf [file EMBJ-40-e107270-s002.pdf]

# Source data for Figure 1

**B**

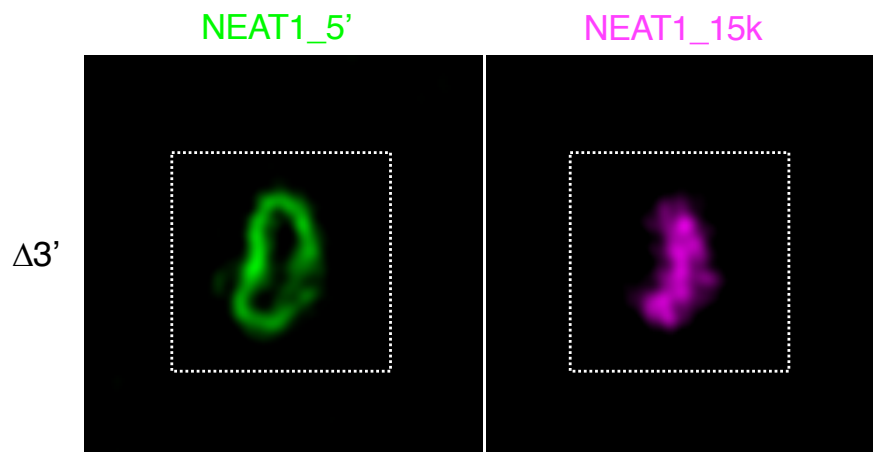

**D**

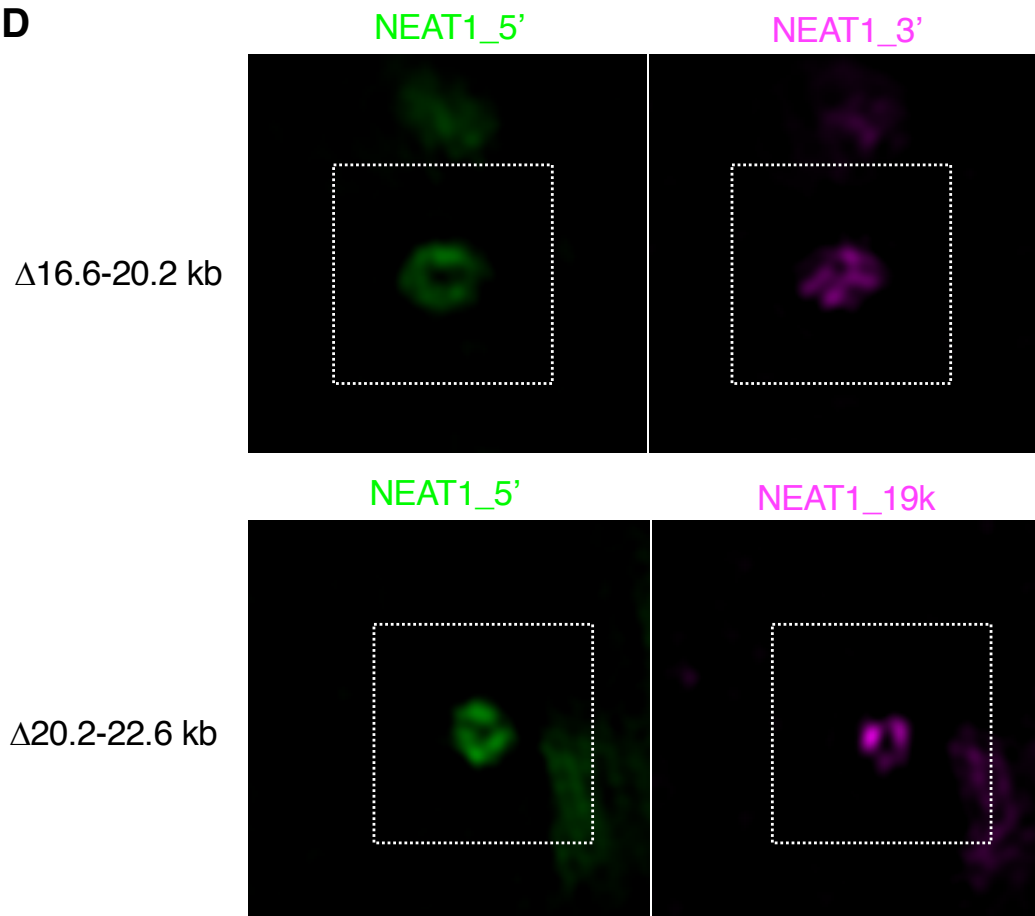

The images in the figure panels are marked by dotted squares.

Supplement: EMBJ-40-e107270-s004.pdf [file EMBJ-40-e107270-s004.pdf]

**B**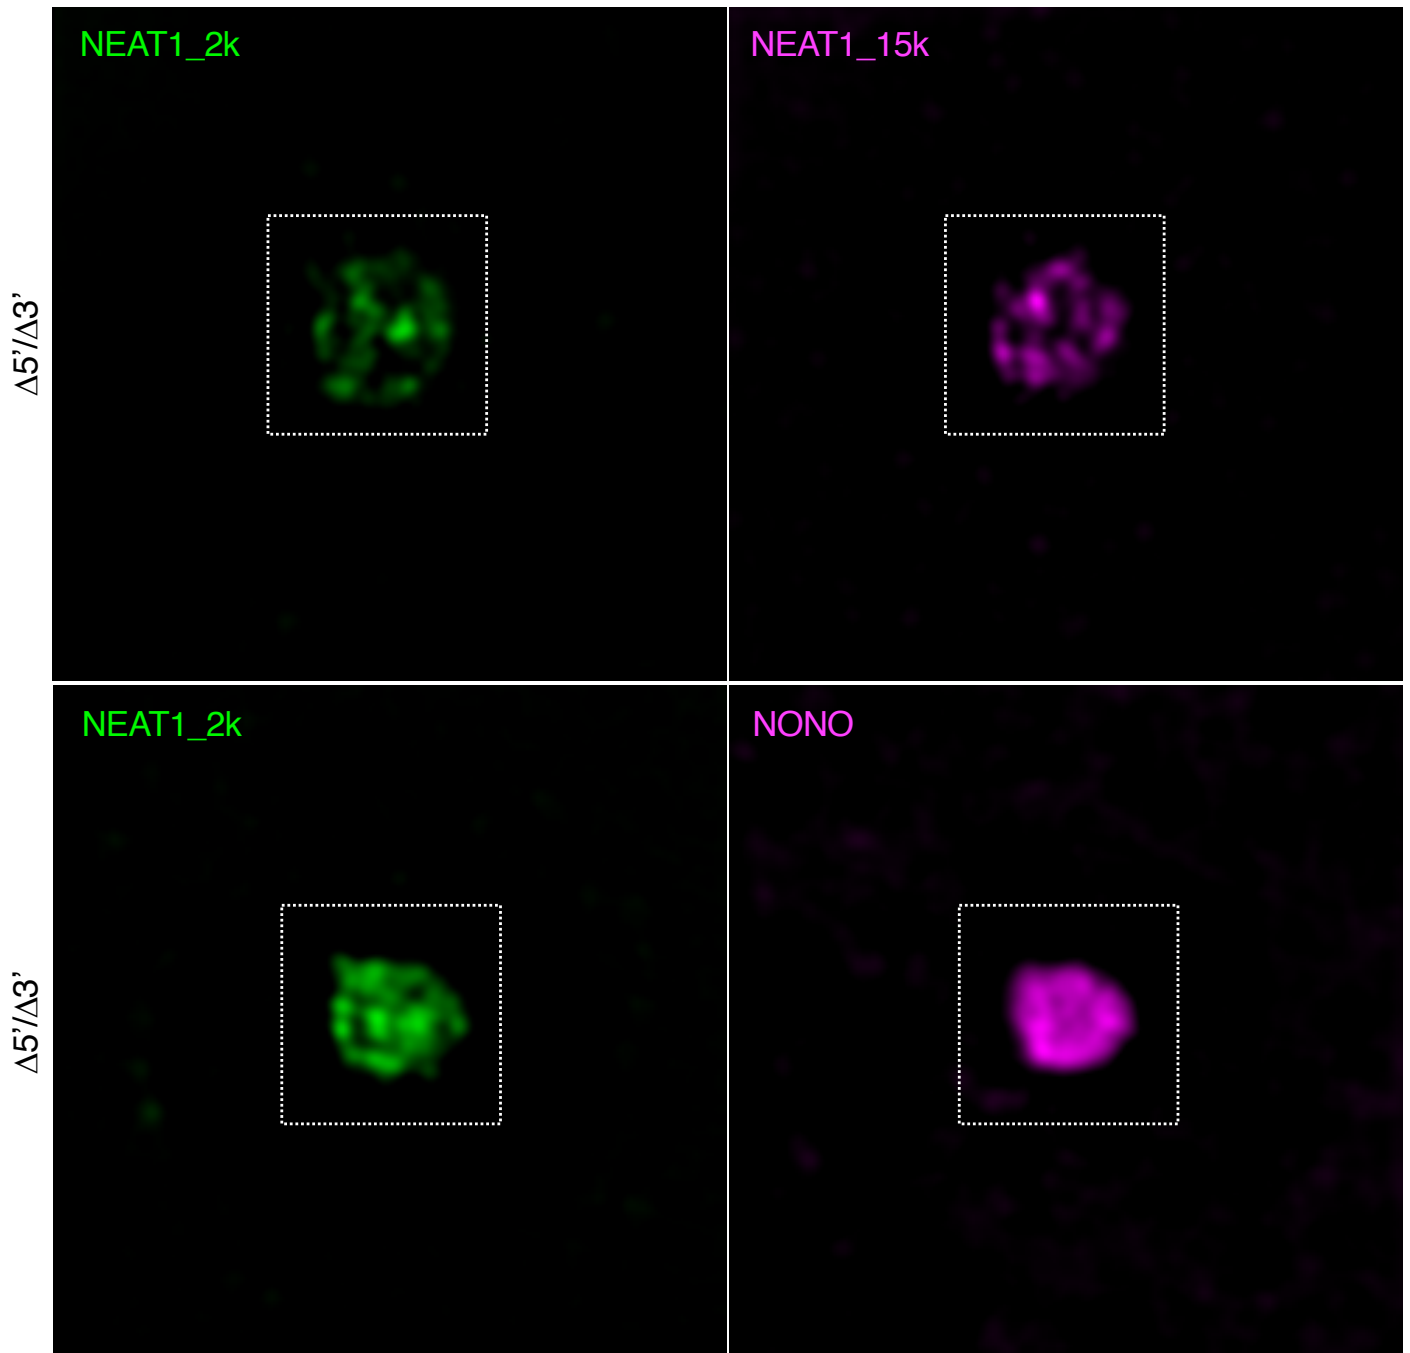

The images in the figure panels are marked by dotted squares.

Supplement: EMBJ-40-e107270-s005.pdf [file EMBJ-40-e107270-s005.pdf]
